# Supplementary material for: Single source precursor route for the first graphene oxide–Pd6P nanocomposite: application in electrochemical hydrogen evolution reaction
Source: Royal Society of Chemistry journal article supplement (doi:10.1039/d2dt00347c), 2022-01-01
Supplement: d2dt00347c1.pdf [file d2dt00347c1.pdf]

## Electronic Supplementary Information

*For*

# Single source precursor route for the first graphene oxide-Pd<sub>6</sub>P nanocomposite: Application in electrochemical hydrogen evolution reaction

Preeti Oswal,<sup>a</sup> Kritika Sood,<sup>b</sup> Siddhant Singh,<sup>a</sup> Aayushi Arora,<sup>a</sup> Anurag Bahuguna,<sup>a</sup> Suraj Purohit<sup>a</sup> and Arun Kumar\*<sup>a</sup>

<sup>a</sup>*Department of Chemistry, School of Physical Sciences, Doon University, Dehradun, India.*

<sup>b</sup>*Institute of Nano Science and Technology (INST) Mohali, Punjab, India.*

*Corresponding author: Arun Kumar, e-mail: [arunkaushik@gmail.com](mailto:arunkaushik@gmail.com),*

*[akumar.ch@doonuniversity.ac.in](mailto:akumar.ch@doonuniversity.ac.in)*

## **S1. Experimental Section**

### **S1.1 Physical measurements**

The  $^1\text{H}$ ,  $^{13}\text{C}\{^1\text{H}\}$  and  $^{31}\text{P}\{^1\text{H}\}$  spectra were recorded on a JNM ECX-500 NMR spectrometer at 500, 125 and 202.46 MHz respectively. Single crystal X-ray diffraction studies were performed on Supernova X-ray diffractometer system at 150 K using Mo  $K\alpha$  radiation (0.710 Å). CrysAlisPro Software (online version) was used for data collection. Mass spectrometric studies were done using Impact HD mass spectrometer operated at 50 Hz.

FEI Technai G2-F30 electron microscope has been used for TEM studies, operated at 200 kV. The specimen for TEM was prepared by dispersing the nanoparticles in methanol by ultrasonic treatment and further dropping the slurry onto a porous carbon film supported on a copper grid and then drying in air. Powder X-ray diffraction (PXRD) studies were carried out on Panalytical XPert diffractometer with Cu filtered radiation using a scan speed of 2 degrees per minute and a step of 0.02 degree. EDX system FEI-Quanta FEG200F has been used for elemental composition studies of nanoparticles. The X-ray photoelectron spectroscopy data was collected on Thermofisher scientific Nexsa base photoelectron spectrometer. Raman spectroscopy was performed by raman optics using a microscope from Horiba lab RAM HR evolution. BET studies were carried out using Quantachrome Autosorb 1C system.

The electrochemical studies were performed in autolab instrument PGSTAT30. The electrochemical workstation comprises of three electrode system where 3 M Ag/AgCl is used as a reference electrode and a platinum wire is used as a counter electrode respectively. The electrochemistry has been performed by taking 0.5 M  $\text{H}_2\text{SO}_4$  in 50 ml of deionized water in a glass cell. All the measurements has been carried out with reference to Ag/AgCl and then plotted against reversible hydrogen electrode (RHE). For measuring Hydrogen Evolution Reaction (HER) study, the Linear sweep voltammetry (LSV) measurement has been done at 5 mV/s scan rate in the potential window of 0 V to -0.60 V Vs RHE. The electrochemical impedance study and chronoamperometry study is carried out at -0.26 V Vs RHE respectively.

### **S1.2 Experimentation**

9-Anthracene carboxaldehyde, sodiumtetrachloropalladate and Nafion were procured from Sigma Aldrich. 2-(diphenylphosphino)ethylamine has been synthesized via reported procedures [1].  $\text{H}_2\text{SO}_4$ , acetone, ethanol, graphite powder all of analytical grade were procured from local suppliers and used without any further purification. Deionized water from a Milli-Q system was used for all syntheses, purification of electrocatalyst and electrochemical studies.

### *Synthesis of ligand L1:*

9-Anthracenecarboxaldehyde (0.206 g, 1 mmol) was stirred in dry ethanol (20 mL) at room temperature for 0.5 h. Thereafter the solution of 2-(diphenylphosphino)ethylamine (0.229 g, 1 mmol) was added dropwise with stirring. The mixture was stirred further at room temperature for 6 h under ambient conditions. The solvent was evaporated off on a rotary evaporator resulting in a yellow precipitate of corresponding ligand **L1**.

**L1**. Yield: 0.899 g (89 %); yellow solid.  $^1\text{H}$  NMR (500 MHz,  $\text{CDCl}_3$ , 25 °C, TMS):  $\delta$  (ppm): 2.70 (t, 2H,  $J = 5$  Hz), 4.01–4.09 (m, 2H), 7.39–7.26 (m, 6H), 7.50–7.48 (m, 3H), 7.56–7.51 (m, 5H), 8.020 (d, 2H,  $J = 8$  Hz), 8.50–8.52 (m, 3H), 9.40 (s, 1H).  $^{13}\text{C}\{^1\text{H}\}$  NMR (125 MHz,  $\text{CDCl}_3$ , 25 °C, TMS):  $\delta$  (ppm): 30.2, 59.8, 124.9, 125.3, 126.8, 128.6, 128.7, 128.8, 128.9, 129.4, 130.6, 131.3, 132.8, 133.0, 160.8.

### *Synthesis of palladium complex 1:*

A solution of  $\text{Na}_2\text{PdCl}_4$  (0.147 g, 0.5 mmol) (in 5 mL of distilled water) was mixed with a solution of **L** (0.208 g, 0.5 mmol) in acetone (10 mL) with vigorous stirring. Complex **1** was obtained instantaneously in the form of orange precipitate which was filtered and dried.

**1**. Yield: 0.270 g (90%); orange solid.  $^1\text{H}$  NMR (500 MHz,  $\text{CDCl}_3$ , 25 °C, TMS):  $\delta$  (ppm): 3.43–3.53 (m, 2H), 4.45–4.49 (m, 2H), 7.54–7.57 (m, 6H), 7.67–7.70 (m, 6H), 8.71 (s, 1H), 8.99 (d, 2H,  $J = 10$  Hz), 11.54 (s, 1H).  $^{13}\text{C}\{^1\text{H}\}$  NMR (125 MHz,  $\text{CDCl}_3$ , 25 °C, TMS):  $\delta$  (ppm): 30.9, 50.1, 123.6, 125.7, 126.1, 127.9, 128.2, 129.1, 129.3, 131.2, 132.2, 133.4, 135.2, 193.2.  $^{31}\text{P}\{^1\text{H}\}$  NMR (202.46 MHz,  $\text{CDCl}_3$ , 25 °C, TMS):  $\delta$  (ppm): 50.185. HRMS,  $[\text{M}-\text{Cl}]^+$  ( $m/z$ ) = 560.02; calculated value for  $\text{C}_{29}\text{H}_{24}\text{Cl}_2\text{NPPd} = 560.04$ .

### *Synthesis of Pd<sub>6</sub>P nanospheres:*

In an oven dried round bottom flask, 0.5 mmol (0.297 g) of the Pd(II) complex **1** was added along with 10 mL of oleic acid–oleyl amine solution (5 mL/5 mL) in presence of  $\text{N}_2$  atmosphere with constant stirring for 2 h at 250 °C. The color of the mixture changed from orange to dark brown within the first 30 minutes and black–brown precipitate started appearing thereafter. The reaction mixture was cooled to room temperature and 20 mL of acetone was added into the flask in order to isolate the black precipitate which was further separated by centrifugation. The isolated precipitate was washed three to four times with methanol and dried in vacuo.

### *Synthesis of GO–Pd<sub>6</sub>P nanocomposite:*

Graphene oxide (GO) was synthesized from graphite powder by modified Hummers method [2]. The suspension of graphene oxide (GO) (100 mg) made in 20 mL of ethanol and nanoparticles of Pd<sub>6</sub>P (50 mg) dispersed in 20 mL of ethanol were mixed. This reaction mixture was allowed to stirred at room temperature for 24 h. the resulting black colored dispersion was centrifuged and further washed three times with acetone and dried in vacuo.

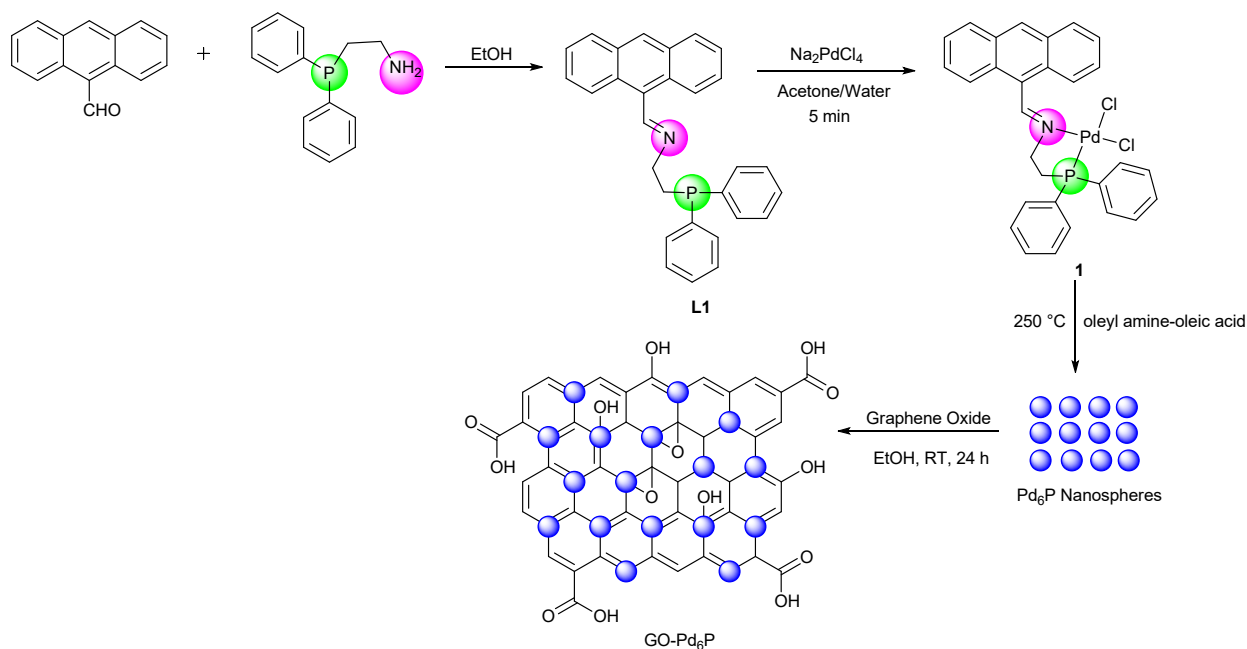

**Scheme S1.** Systematic synthesis of L1, 1, Pd<sub>6</sub>P nanospheres and GO-Pd<sub>6</sub>P composite.

#### *Electrochemical measurement:*

The electrochemical studies were carried out using Autolab (PGSTAT30) instrument with catalyst coated glassy carbon electrode (GCE) as working electrode, platinum wire as counter electrode and Ag/AgCl (saturated KCl) as reference electrode. A mixture of ethanol (200  $\mu$ L) and Nafion (10% v/v) was used to disperse the catalyst (5 mg) for preparing the catalyst ink. A 60  $\mu$ L drop of ink was transferred to GCE (area = 0.07 cm<sup>2</sup>). In this way 1.5 mg/cm<sup>2</sup> of catalyst was placed on electrode. All the three electrodes were fixed in the cell consisting 0.5 M H<sub>2</sub>SO<sub>4</sub> solution (electrolyte). All the measurements has been carried out with reference to Ag/AgCl and then plotted against reversible hydrogen electrode (RHE). For measuring Hydrogen Evolution Reaction (HER) study, the Linear sweep voltammetry (LSV) measurement has been done at 5 mV/s scan rate in the potential window of 0 V to -0.60 V Vs RHE. The electrochemical impedance study and chronoamperometry study is carried out at -0.26 V Vs RHE respectively.

#### *Fabrication of electrode*

For the preparation of the working electrode, 5 mg of GO-Pd<sub>6</sub>P nanoparticles were dispersed in a 200  $\mu$ L ethanol. The sample is ultrasonicated for 45 min. at room temperature in order to achieve a dispersion. Afterwards, a nafion resin solution (10 % v/v) is added as a binder followed by 15 min of ultrasonication. The as-obtained dispersion (60  $\mu$ L) was drop cast onto glassy carbon electrode (GCE) that have a 0.07 cm<sup>2</sup> geometric surface area (S<sub>g</sub>). Further, the Go-Pd<sub>6</sub>P@GCE has been used effectively as a working electrode with the calculated mass loading of 1.5 mg.

#### *Electrochemical measurements*

The hydrogen evolution study for GO-Pd<sub>6</sub>P nanoparticles was recorded in 50 ml of 0.5 M H<sub>2</sub>SO<sub>4</sub> (pH=0.60) electrolyte solution on a three electrode based electrochemical workstation. Prior to the electrochemical measurement the electrolyte solution was saturated with inert gas (N<sub>2</sub>) for at least 30 min to remove the dissolved gases. The platinum wire was used as a counter electrode and Ag/AgCl in 3 M saturated KCl was used as a reference electrode. The current measured is normalized to S<sub>g</sub> (geometric surface area of glassy carbon electrode) and the potential window in Ag/AgCl is converted to RHE using Nernst equation (eq. 1) as follows.

$$E_{RHE} = E_{Ag/AgCl} + 0.059 \times pH + E_{Ag/AgCl}^0 \quad (1)$$

where,  $\frac{E^{\circ}_{Ag}}{AgCl}$  is the standard electrode potential equals to 0.197 V at 25°C

The kinetics of the catalyst was determined by evaluating the Tafel slope. The Tafel slope shows how fast the current is varied against overpotential for H<sub>2</sub> evolution and is measured from eq. 2

$$\eta = b \log j + x \quad (2)$$

where  $\eta$  gives over potential,  $b$  is the Tafel slope,  $j$  is the current density and  $x$  is constant. Further, to know the intrinsic mechanistic behaviour of the electrocatalyst, electrochemical impedance spectroscopy (EIS) has been done. The nyquist plot is obtained from EIS study at a frequency range of 0.01 Hz – 100 kHz that gives Ohmic resistance ( $R_{\Omega}$ ) and charge transfer resistance ( $R_{ct}$ ) respectively. The spectrum fitting was done with FRA software (Nova 1.1) Additionally, the cyclic voltammetry (CV) scan was performed in the non-faradic region at 10, 20, 40, 60, 80 and 100 mV/s varying scan rates to calculate charge double-layer ( $C_{dl}$ ) value. The value of the slope gives the  $C_{dl}$  value, the slope was evaluated from the graph between current density and scan rate at a fixed potential of 0.9 V. The electrochemically active surface area (ECSA) that signifies the electrode area readily available for catalysis was calculated from  $C_{dl}$  value. Further, the roughness factor was calculated from the ECSA value using eq. 3.

$$R_f = \frac{ECSA}{area\ of\ electrode} \quad (3)$$

TOF values have been calculated by following the exact method as demonstrated by T. F. Jaramillo and coworkers using eq. 4.

For the calculation of the TOF of the GO-Pd<sub>6</sub>P we used the following formula

$$TOF = \frac{3.12 \times 10^{15} \left( \frac{H_2}{S} \text{ per } \frac{mA}{cm^2} \right) \times |j|}{\#surface\ sites \times A_{ECSA}}$$

$$\text{Number of surface active sites in Pd}_6\text{P} = \left( \frac{24 \text{ atoms/unit cell}}{433.7 \text{ \AA}^3/\text{unit cell}} \right)^{\frac{2}{3}} = 1.45 \times 10^{15} \text{ cm}^{-2}_{\text{real}}$$

$$TOF = \frac{3.12 \times 10^{15} \left( \frac{H_2}{\text{cm}^2} \text{ per } \frac{\text{mA}}{\text{cm}^2} \right) \times |j|}{1.45 \times 10^{15} \frac{\text{atoms}}{\text{cm}^2} \times A_{\text{ECSA}}} \quad (4)$$

## S2. Characterization

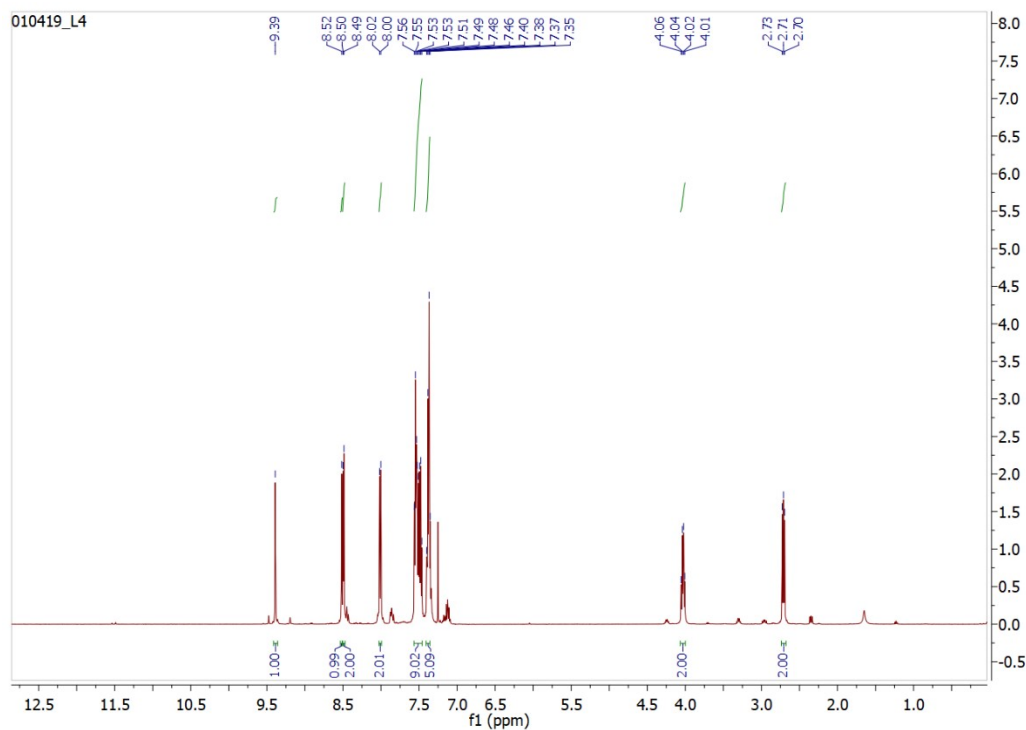

**Fig. S1.** <sup>1</sup>H NMR spectra of L1

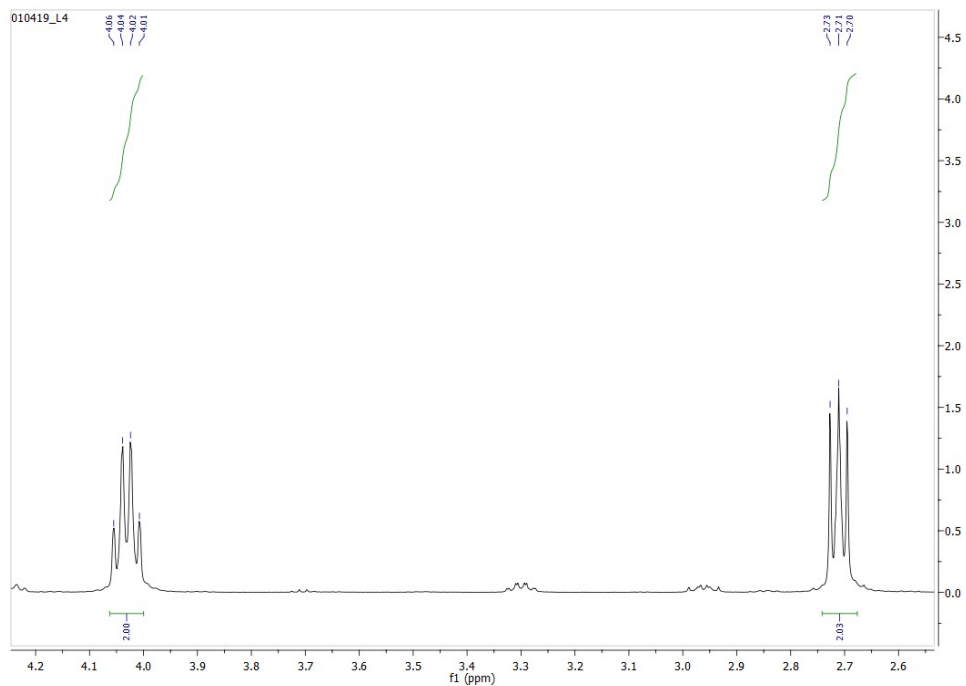

**Fig. S2.**  $^1\text{H}$  NMR spectra of L1 (aliphatic region)

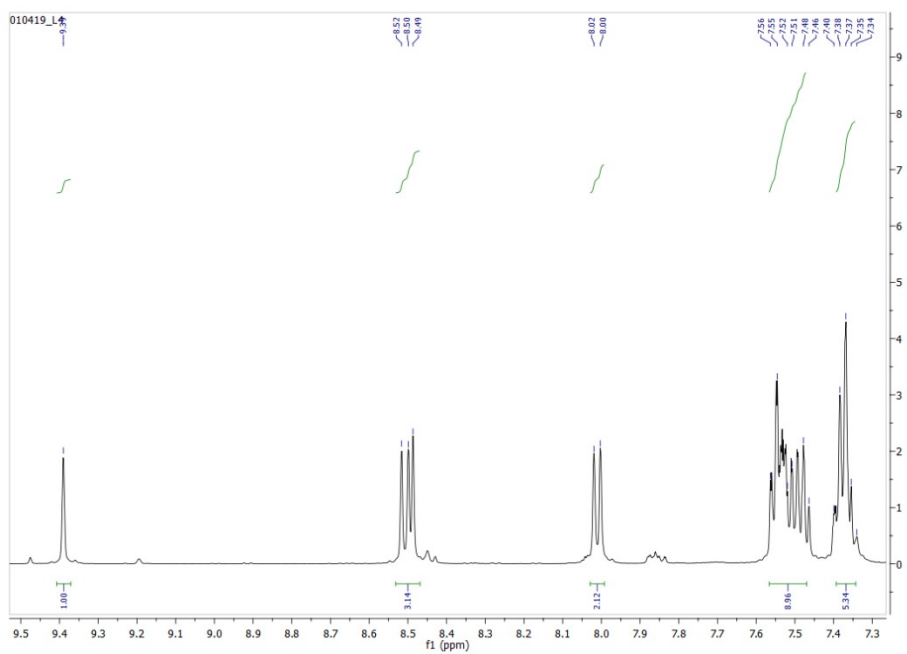

**Fig. S3.**  $^1\text{H}$  NMR spectra of L1 (aromatic region)

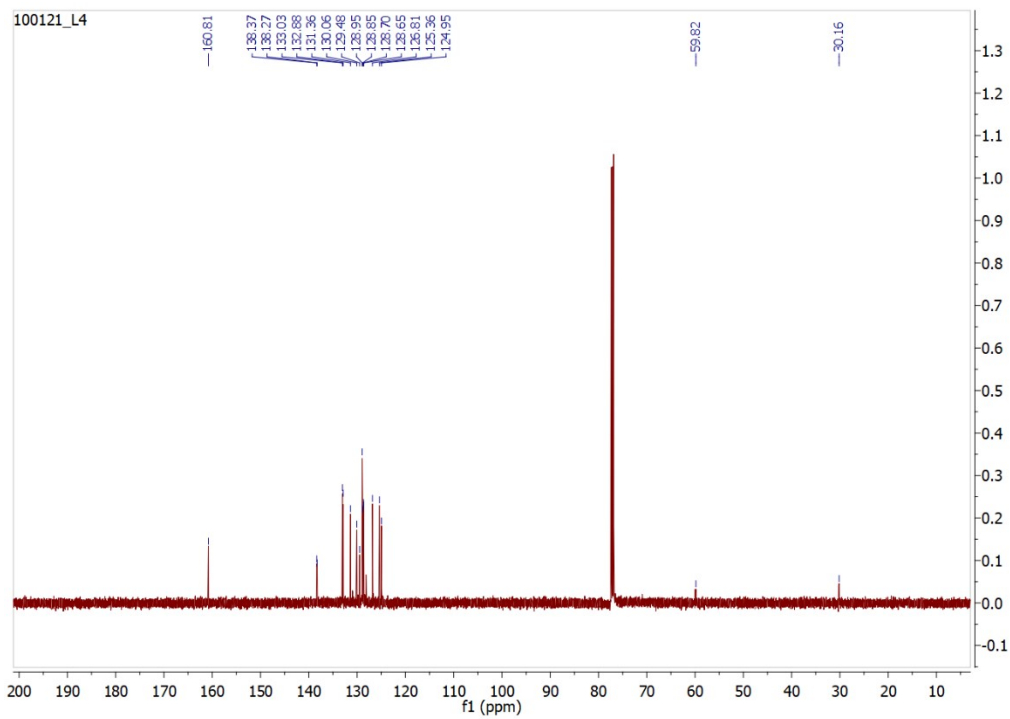

**Fig. S4.**  $^{13}\text{C}\{^1\text{H}\}$  NMR spectra of L1

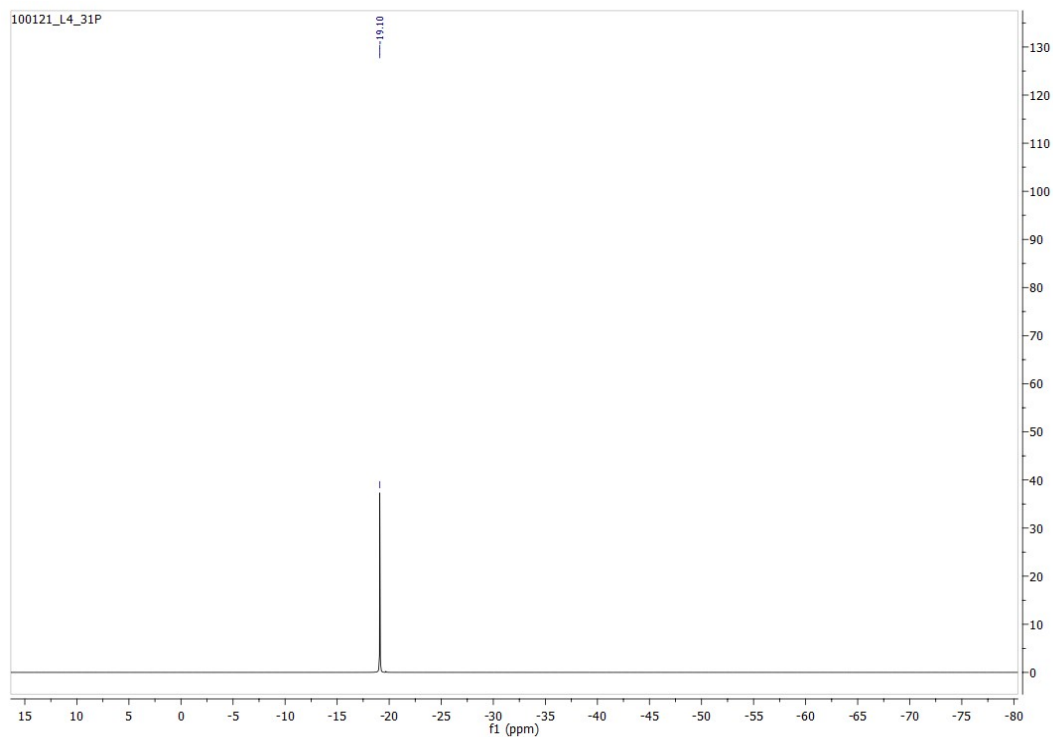

**Fig. S5.**  $^{31}\text{P}\{^1\text{H}\}$  NMR spectra of L1



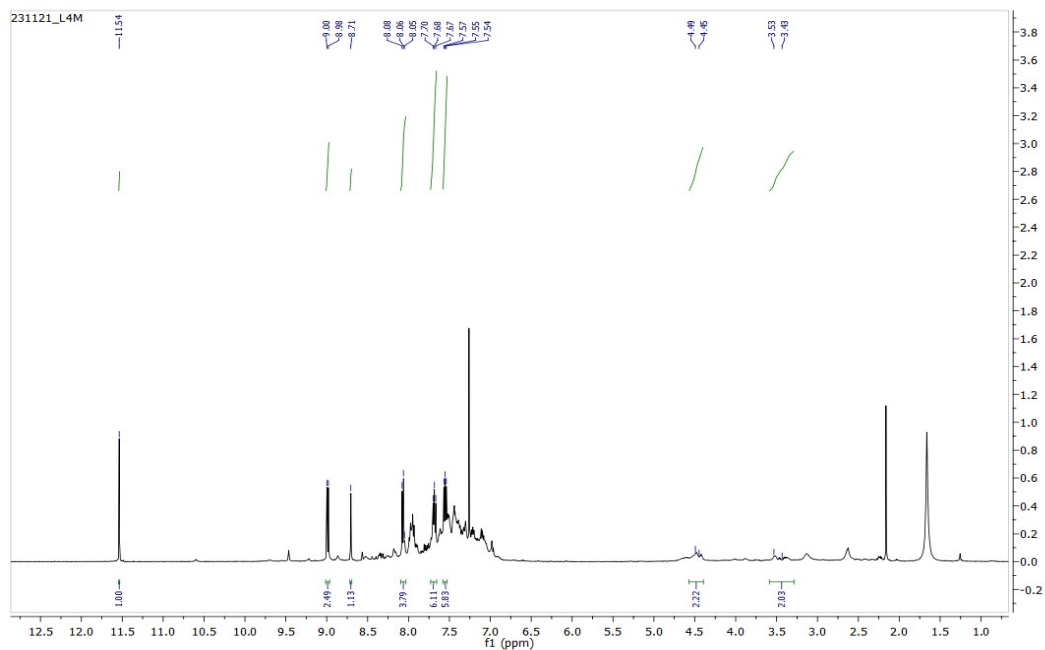

Fig. S6.  $^1\text{H}$  NMR spectra of **1**

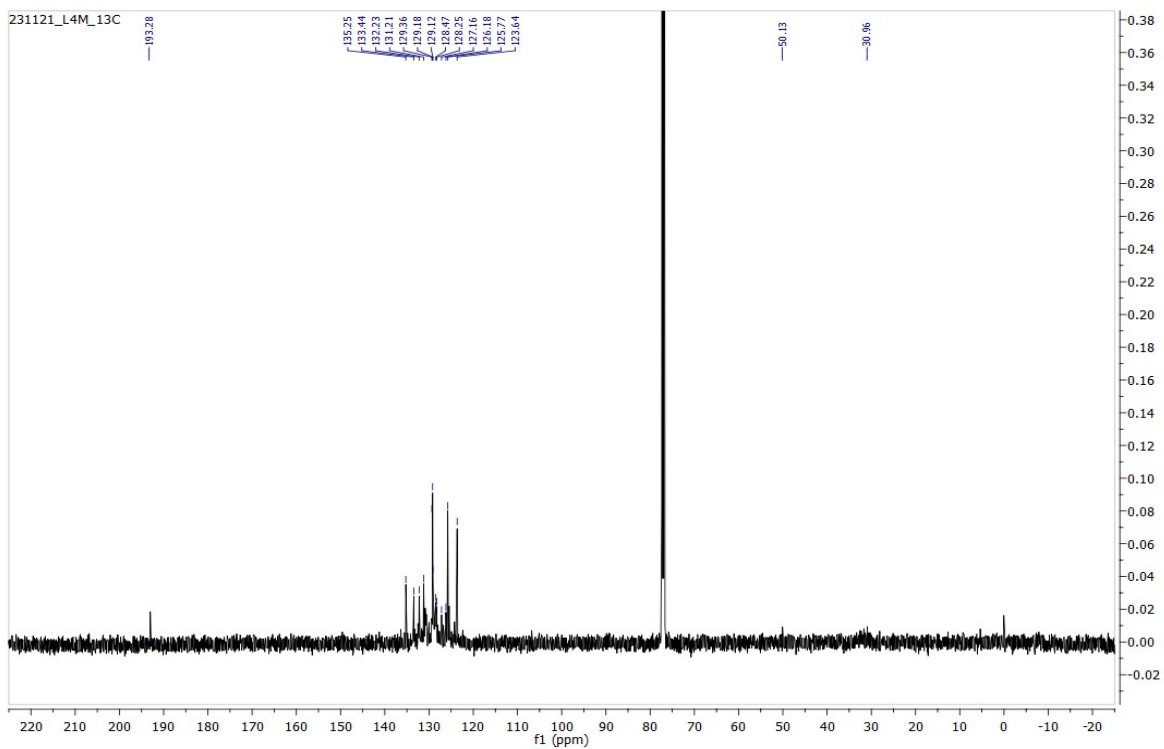

Fig. S7.  $^{13}\text{C}\{^1\text{H}\}$  NMR spectra of **1**

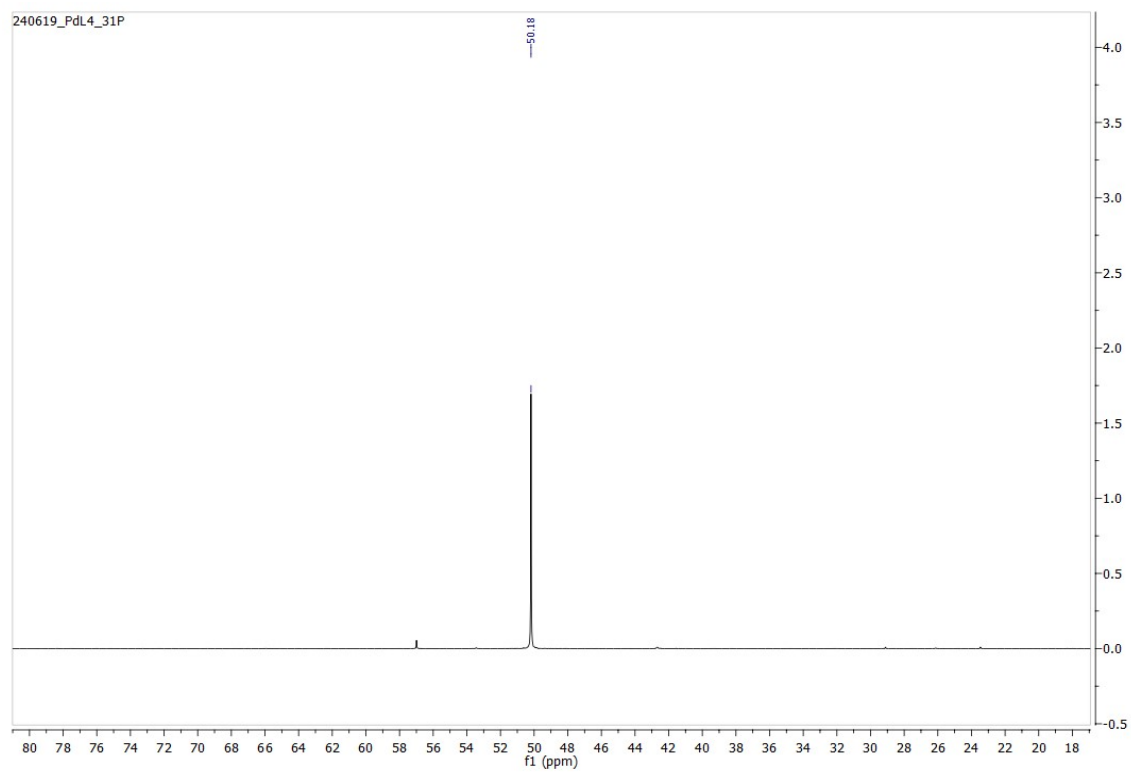

**Fig. S8.**  $^{31}\text{P}\{^1\text{H}\}$  NMR spectra of **1**

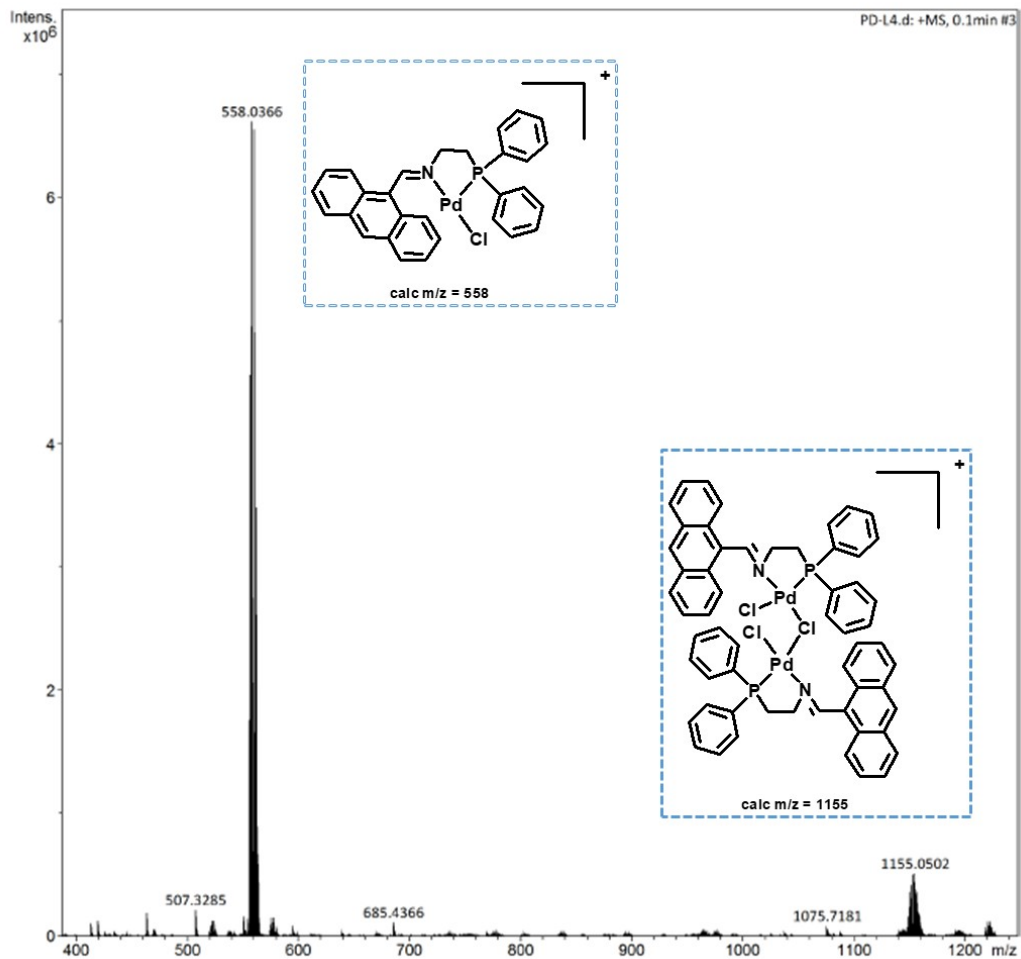

Fig. S9. Mass Spectra of 1

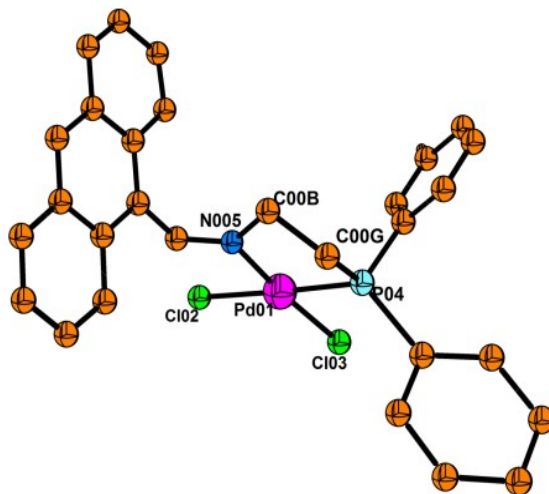

Fig. S10. ORTEP diagram of complex 1.

**Table S1. Crystal data and structural refinements for Pd(II) complex 1.**

| Parameters                            | Pd(II) complex 1                                     |
|---------------------------------------|------------------------------------------------------|
| Formula                               | C <sub>29</sub> H <sub>24</sub> C <sub>12</sub> PNPd |
| Formula Weight (g mol <sup>-3</sup> ) | 1247.58                                              |
| Temperature/K                         | 293(2)                                               |
| Space Group                           | P-1                                                  |
| Crystal System                        | Triclinic                                            |
| a(Å)                                  | 8.1929(6)                                            |
| b(Å)                                  | 9.3335(6)                                            |
| c(Å)                                  | 18.8176(9)                                           |
| α(°)                                  | 79.704(5)                                            |
| β(°)                                  | 84.877(5)                                            |
| γ(°)                                  | 74.638(6)                                            |
| V(Å <sup>3</sup> )                    | 1363.86(15)                                          |
| Z                                     | 2                                                    |
| Density (g cm <sup>-3</sup> )         | 1.448                                                |
| F(000)                                | 600.0                                                |
| Theta range for data collection       | 2.202<θ<28.223                                       |
| Index ranges                          | -8 < h < 10<br>-11 < k < 10<br>-9 < l < 11           |
| Reflections Collected                 | 4928                                                 |
| Independent Reflection                | 5863                                                 |
| GOF on F <sup>2</sup>                 | .994                                                 |
| R1 (I > 2σ(I))                        | 0.0754                                               |
| R1 (all data)                         | 0.0872                                               |
| w R2 (I > 2σ(I))                      | 0.2292                                               |
| w R2 (all data)                       | 0.2435                                               |
| CCDC                                  | 2124189                                              |

**Table S2. Selected bond lengths and bond angles of 1**

| <b>Bond lengths (Å)</b> |            |
|-------------------------|------------|
| Pd01–P04                | 2.2155(18) |
| Pd01–N005               | 2.073(5)   |
| Pd01–Cl02               | 2.3748(18) |
| Pd01–Cl03               | 2.2997(17) |
| <b>Bond angles (°)</b>  |            |
| N005–Pd01–Cl02          | 93.41(15)  |
| N005–Pd01–Cl03          | 174.34(16) |
| P04–Pd01–Cl02           | 177.92(6)  |
| P04–Pd01–Cl03           | 89.90(7)   |
| N005–Pd01–P04           | 84.57(15)  |

|                |          |
|----------------|----------|
| Cl02-Pd01-Cl03 | 92.11(7) |
|----------------|----------|

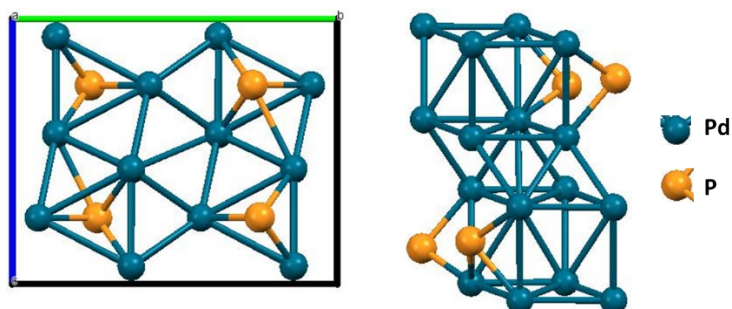

Fig. S11. Schematic representation of Pd<sub>6</sub>P crystal.

Table S3. Binding energies of corresponding core levels of Pd<sub>6</sub>P and GO-Pd<sub>6</sub>P and the observed shift values

| XPS core level       | Binding energy Pd <sub>6</sub> P (eV) | Binding energy GO-Pd <sub>6</sub> P (eV) | Observed shift (eV) |
|----------------------|---------------------------------------|------------------------------------------|---------------------|
| Pd 3d <sub>5/2</sub> | 336.2                                 | 335.7                                    | 0.5±0.1             |
|                      | 338.1                                 | 337.4                                    | 0.7±0.1             |
| Pd 3d <sub>3/2</sub> | 341.6                                 | 341.0                                    | 0.6±0.1             |
|                      | 342.4                                 | 341.9                                    | 0.5±0.1             |
| P 2P <sub>1/2</sub>  | 134.4                                 | 133.9                                    | 0.5±0.1             |
| P 2P <sub>3/2</sub>  | 130.6                                 | 130.0                                    | 0.6±0.1             |

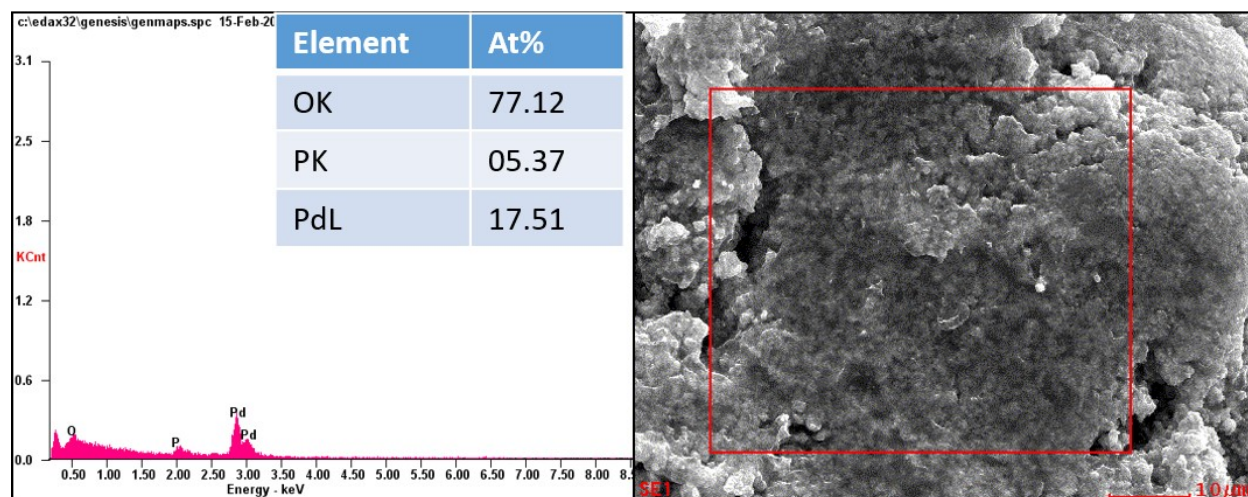

Fig S12. SEM-EDX spectrum of Pd<sub>6</sub>P

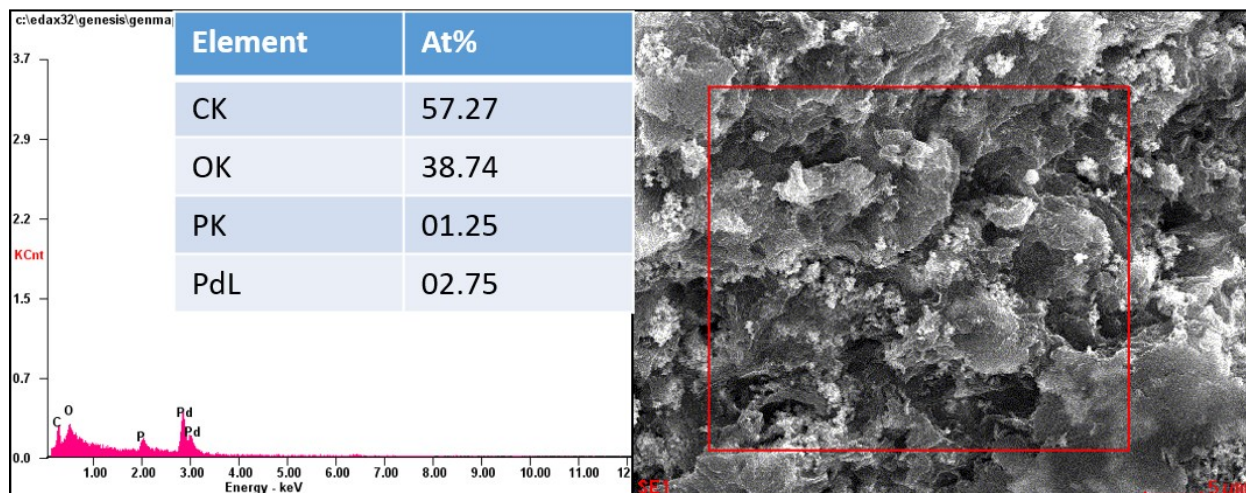

**Fig S13.** SEM-EDX spectrum of GO-Pd<sub>6</sub>P

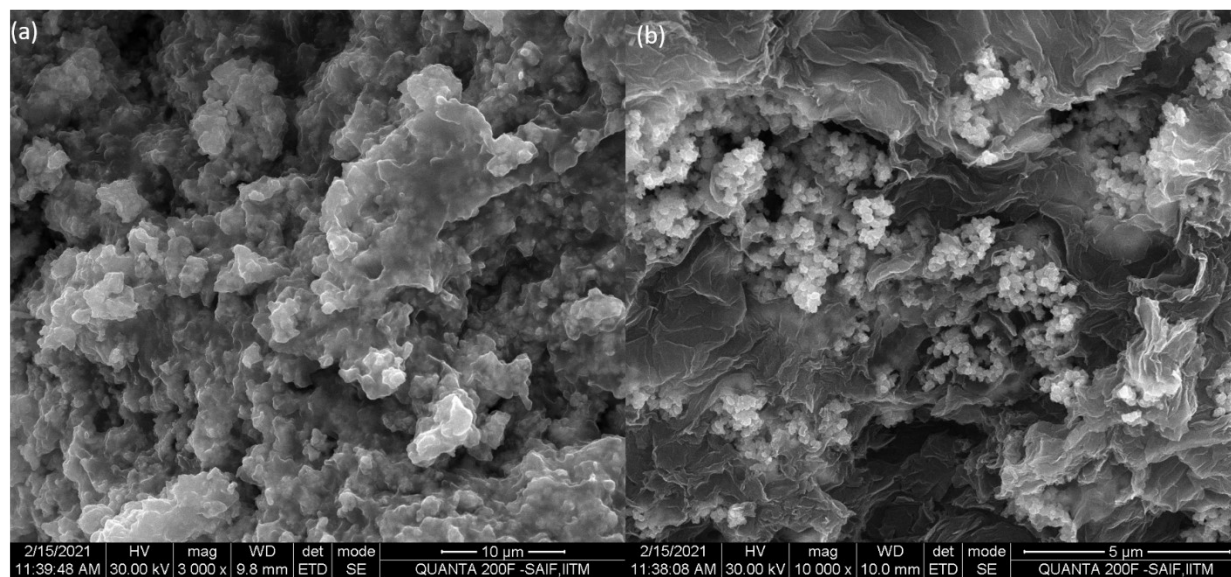

**Fig S14.** SEM images of (a) Pd<sub>6</sub>P; (b) GO-Pd<sub>6</sub>P.

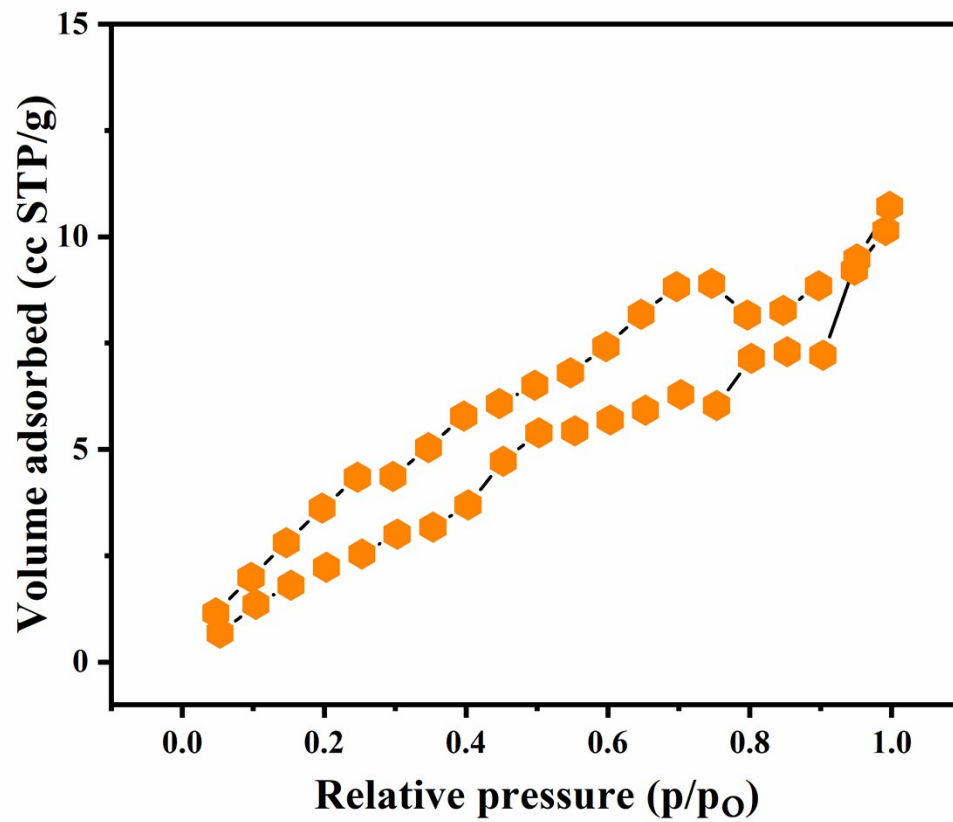

Fig S15. BET analysis of Pd<sub>6</sub>P



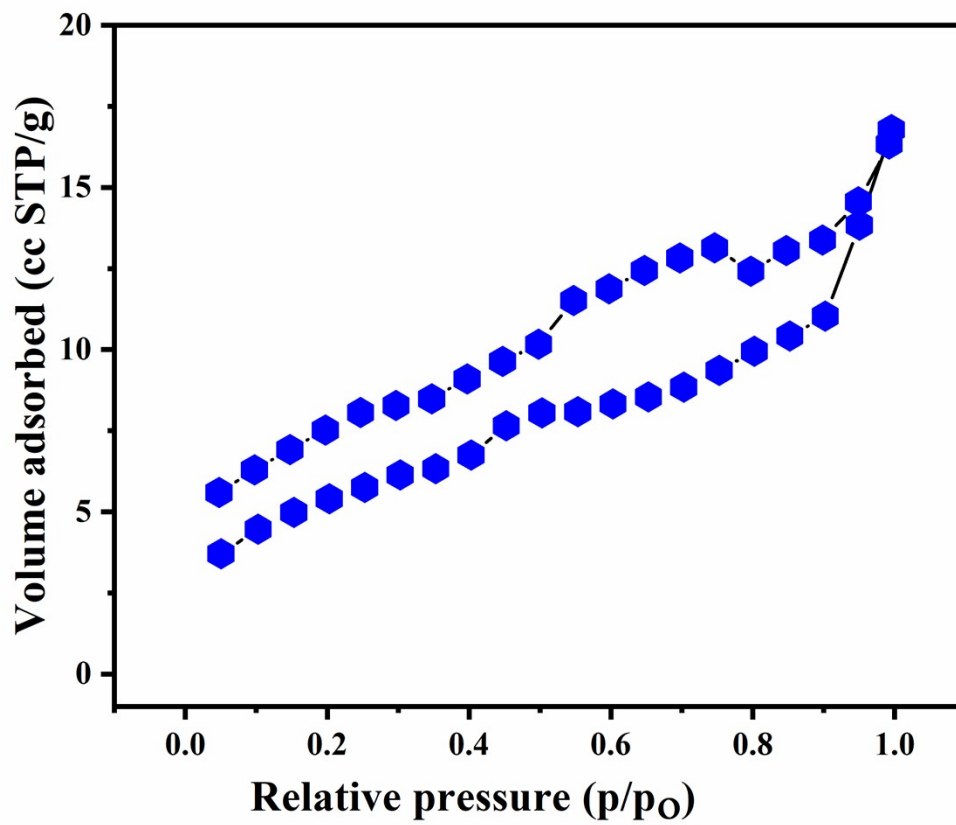

Fig S16. BET analysis of GO-Pd<sub>6</sub>P



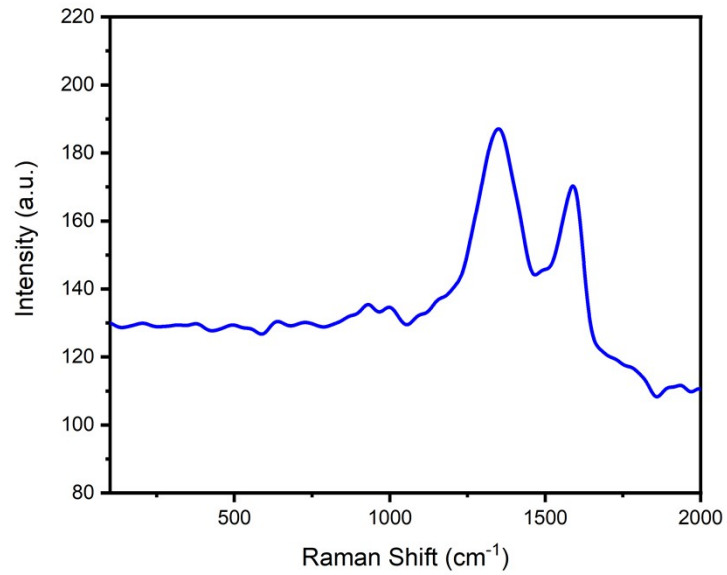

**Fig S17.** Raman spectra of GO-Pd<sub>6</sub>P

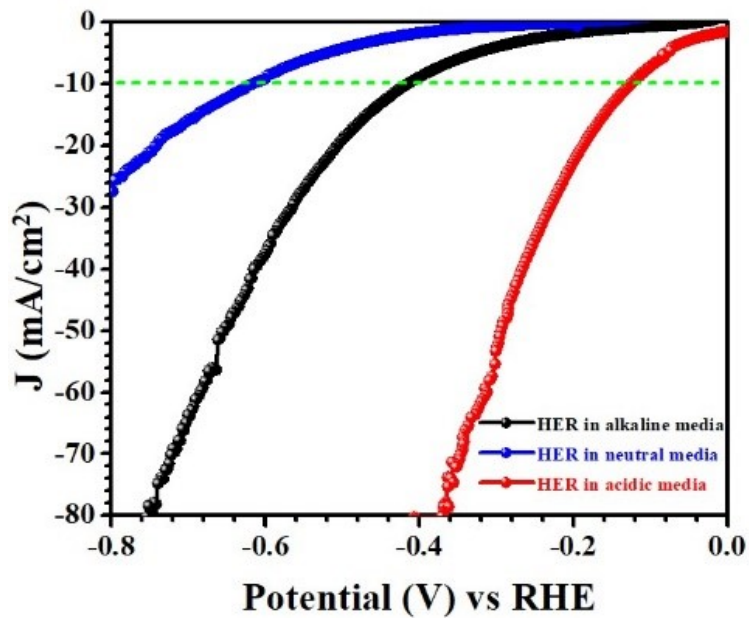

**Fig S18.** LSV results in alkaline, neutral and acidic media

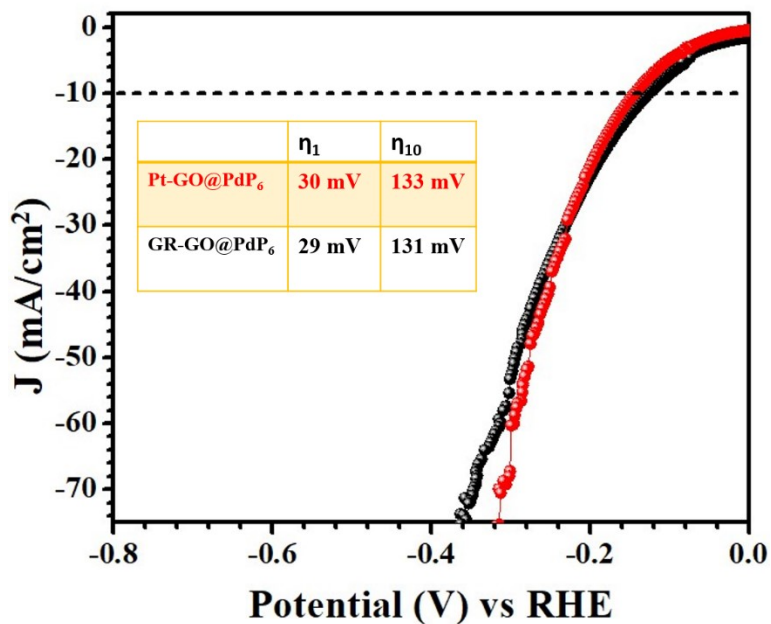

Fig S19. LSV results using Graphite rod as counter electrode

Table S4. Electrocatalytic parameters for hydrogen evolution reaction

| Materials                  | Onset potential at 1 mA/cm <sup>2</sup> (mV) | Over potential (mV) 10mA/cm <sup>2</sup> | Tafel slope | Charge transfer resistance (R <sub>ct</sub> ) |
|----------------------------|----------------------------------------------|------------------------------------------|-------------|-----------------------------------------------|
| GO- Pd <sub>6</sub> P @GCE | 30                                           | 133                                      | 60          | 120                                           |
| Pd <sub>6</sub> P@ GCE     | 54                                           | 312                                      | 159         | 232                                           |
| Bare GCE                   | 183                                          | 506                                      | 194         | 1424                                          |

Table S5. Results of the electrochemically active surface area (ECSA) from C<sub>dl</sub> and roughness factor (R<sub>f</sub>) for each of the electrocatalysts prepared in 0.5 M H<sub>2</sub>SO<sub>4</sub> hydrogen evolution reaction

| Materials                             | GO- Pd <sub>6</sub> P @GCE |
|---------------------------------------|----------------------------|
| C <sub>dl</sub> (μF/cm <sup>2</sup> ) | 474                        |
| ECSA (cm <sup>2</sup> /mg)            | 135                        |
| R <sub>f</sub>                        | 1928                       |

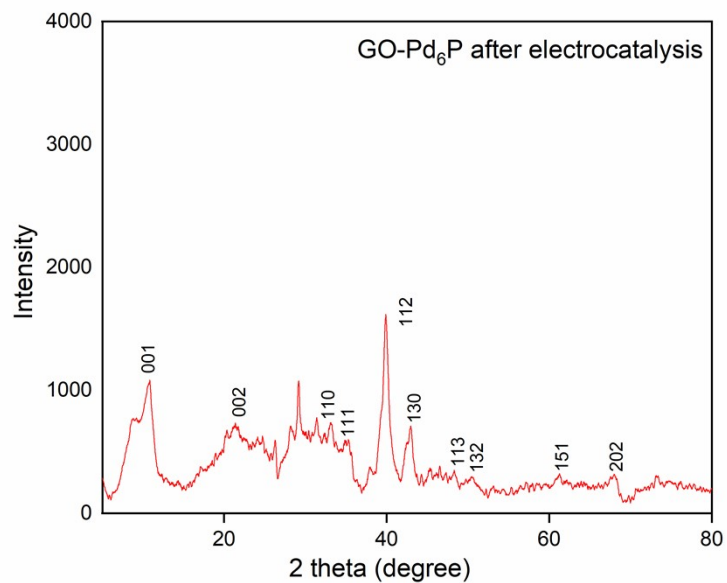

**Fig S20.** PXRD of GO-Pd<sub>6</sub>P (post-electrocatalysis)

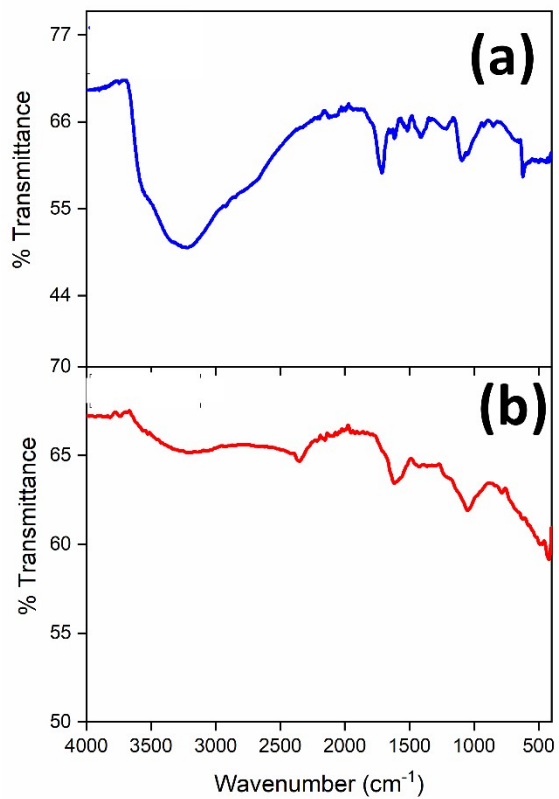

**Fig S21.** FTIR of GO-Pd<sub>6</sub>P (a) before electrocatalysis (b) post-electrocatalysis

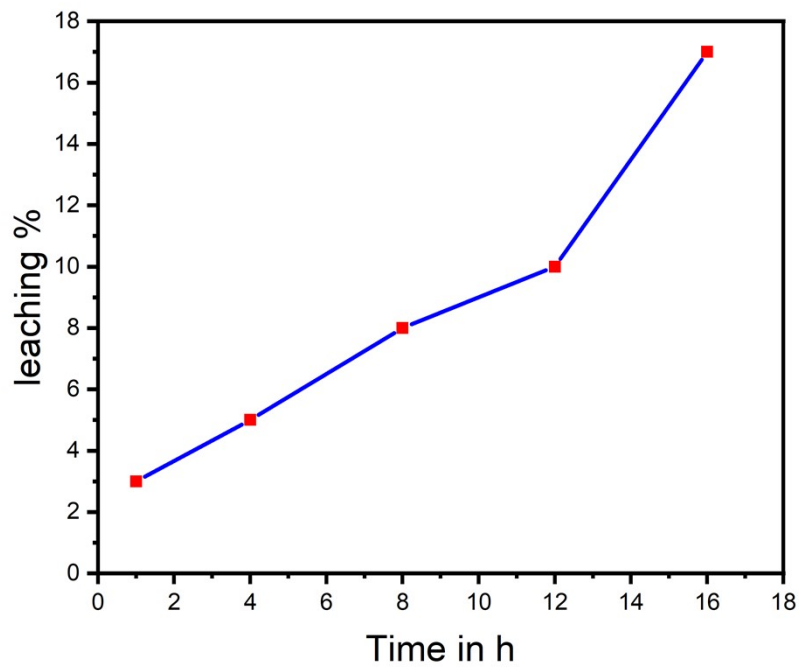

**Fig S22.** ICP results for leaching of Pd upto 16 hours

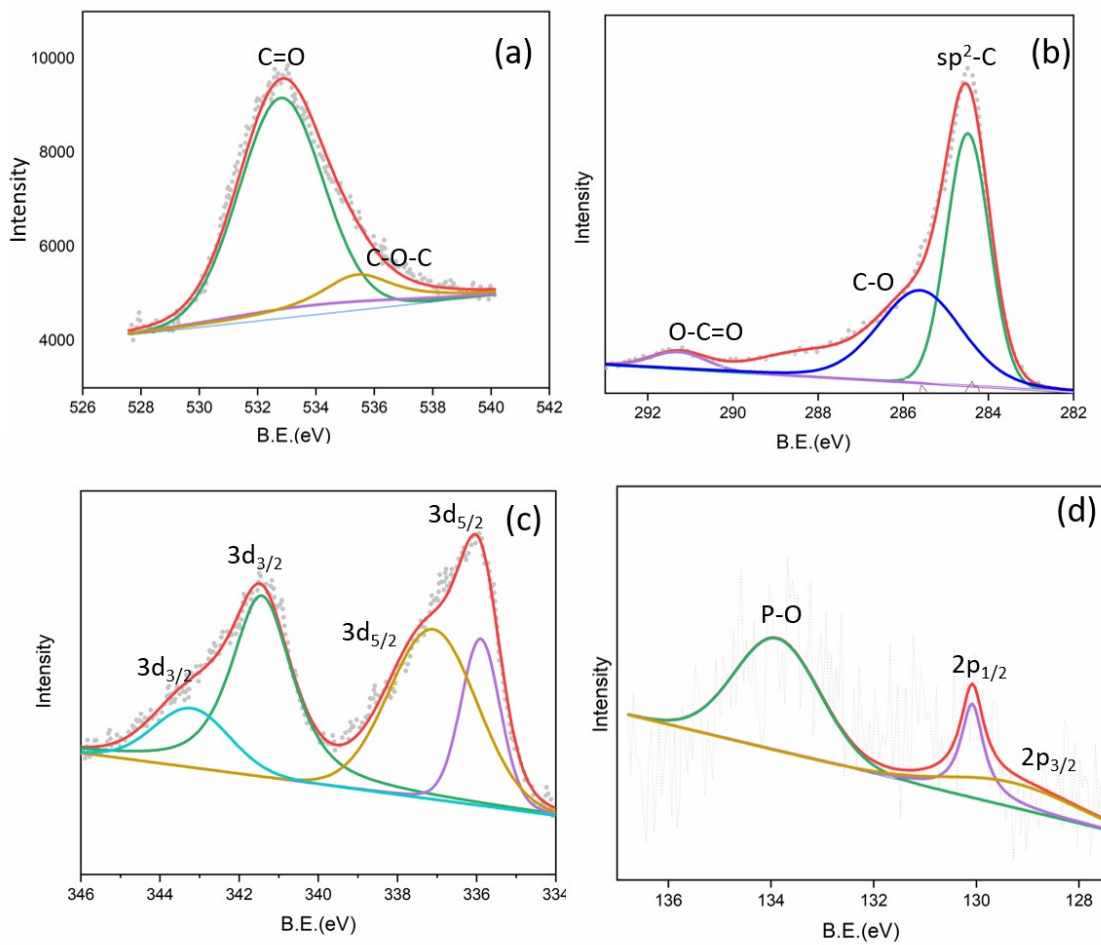

**Fig S23.** XPS Spectra (a) O1s, (b) C1s, (c) Pd3d (d) P2p of GO- Pd<sub>6</sub>P (post-electrocatalysis)

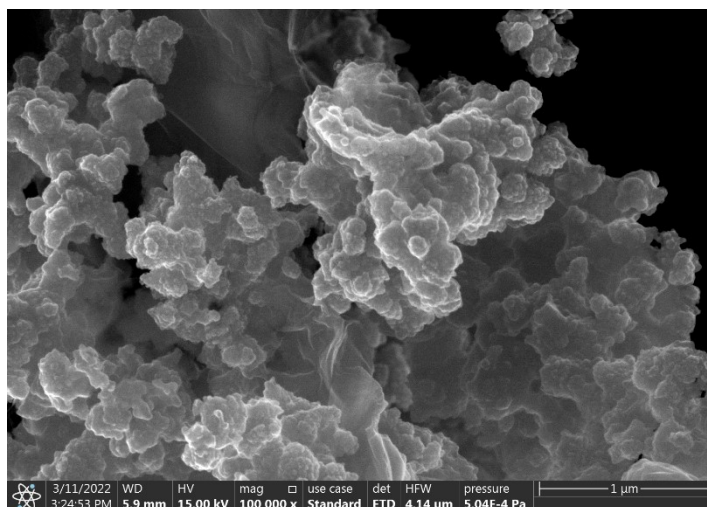

**Fig S24.** SEM image of GO-Pd<sub>6</sub>P (post-electrocatalysis)

**Table S6.** Comparison of HER performance of some transition metal based catalytic system with present system:

| S. No. | Material                          | $\eta_{100}$ (mV)   | Tafel Slope (mV/dec) | Exchange current Density (mA cm <sup>-2</sup> ) | Mass loading (mg/cm <sup>2</sup> ) | Reference   |
|--------|-----------------------------------|---------------------|----------------------|-------------------------------------------------|------------------------------------|-------------|
| 1.     | GO-Pd <sub>6</sub> P              | 133                 | 60                   | 10                                              | 1.5                                | This report |
| 2.     | MoP                               | 271                 | 54                   | 0.086                                           | 0.36                               | 3           |
| 3.     | Ni <sub>2</sub> P@Ti              | 180                 | 46                   | 3.3                                             | 1                                  | 4           |
| 4.     | CoP-CC                            | 204                 | 51                   | 0.288                                           | 0.92                               | 5           |
| 5.     | Go-Co <sub>2</sub> P              | 137                 | 83                   | 3.48                                            | 1.33                               | 6           |
| 6.     | CoSe <sub>2</sub> NP@CP           | 181                 | 40                   | 0.049                                           | 2.8                                | 7           |
| 7.     | NiSe <sub>2</sub>                 | 358                 | 72.1                 | -                                               | 0.4                                | 8           |
| 8.     | NiSe                              | 331                 | 28.6                 | -                                               | 0.4                                | 8           |
| 9.     | Pd-graphene nanocomposite         | -                   | 46                   | -                                               | 0.02                               | 9           |
| 10.    | Pd <sub>3.02</sub> Te NWs/rGO     | 355                 | 90                   | 1.807                                           | -                                  | 10          |
| 11.    | Pd <sub>4</sub> Se                | 180 ( $\eta_{10}$ ) | 57                   | 0.23                                            | -                                  | 11          |
| 12.    | Pd <sub>17</sub> Se <sub>15</sub> | 162 ( $\eta_{10}$ ) | 56                   | 0.006                                           | -                                  | 11          |
| 13.    | Pd <sub>7</sub> Se <sub>4</sub>   | 94 ( $\eta_{10}$ )  | 50                   | 0.025                                           | -                                  | 11          |
| 14.    | Pd nanoparticle Assemblies        | 80                  | 30                   | -                                               | 0.28                               | 12          |

|     |              |                 |    |      |      |    |
|-----|--------------|-----------------|----|------|------|----|
| 15. | PdPS@rGO     | ~90( $\eta$ 10) | 46 | 0.14 | -    | 13 |
| 16. | PtPd on WC/C |                 | 21 | -    | 0.05 | 14 |

## REFERENCES

1. P. R. Kumar, S. Upreti and A. K. Singh, *Polyhedron*, 2008, **27**, 1610-1622.
2. W. S. Hummers and R. E. Offeman, *J. Am. Chem. Soc.*, 1958, **80**, 1339-1339.
3. Z. Xing, Q. Liu, A. M. Asiri and X. Sun, *Adv. Mater.*, 2014, **26**, 5702.
4. E. J. Popczun, J. R. McKone, C. G. Read, A. J. Biacchi, A. M. Wiltrout, N. S. Lewis and R. E. Schaak, *J. Am. Chem. Soc.*, 2013, **135**, 9267.
5. J. Tian, Q. Liu, A. M. Asiri, and X. Sun, *J. Am. Chem. Soc.*, 2014, **136**, 7587.
6. A. K. Sharma, H. Joshi, K. Ojha and A. K. Singh, *Chem. Commun.*, 2019, **55**, 2186-2189.
7. D. Kong, H. Wang, Z. Lu and Y. Cui, *J. Am. Chem. Soc.*, 2014, **136**, 4897.
8. K. S. Bhat and H. S. Nagaraja, *Int. J. Hydrog. Energy*, 2018, **43**, 19851-19863.
9. S. Ghasemi, S. R. Hosseini, S. Nabipour and P. Asen, *Int. J. Hydrog. Energy*, 2015, **40**, 16184-16191.
10. Jiao, Lixin, F. Li, X. Li, R. Ren, J. Li, X. Zhou, J. Jin, and R. Li, *Nanoscale*, 2015, **44**, 18441-18445.
11. S. Kukunuri, P. M. Austeria and S. Sampath, *Chem. Commun.*, 2016, **52**, 206-209.
12. S. Liu, X. Mu, H. Duan, C. Chen and H. Zhang, *Eur. J. Inorg. Chem.*, 2017, **2017**, 535-539.
13. S. Sarkar and S. Sampath, *Chem. Commun.*, 2014, **50**, 7359-7362.
14. M. Wu, P. K. Shen, Z. Wei, S. Song and M. Nie, *J. Power Sources*, 2007, **166**, 310-316.
